# Supplementary material for: Expansion of the Strigolactone Profluorescent Probes Repertory: The Right Probe for the Right Application
Source: PubMed Central journal article supplement (PMC9201908; doi:10.3389/fpls.2022.887347), 2022-06-02
Supplement: Data_Sheet_1.pdf [file Data_Sheet_1.pdf]

## *Supplementary Material*

### **Expansion of the strigolactone profluorescent probes repertory: the right probe for the right application**

**Alexandre de Saint Germain<sup>1</sup>, Guillaume Clavé<sup>2</sup>, Paul Schouweiler<sup>1</sup>, Jean-Paul Pillot<sup>1</sup>, Abhay-Veer Singh<sup>1</sup>, Arnaud Chevalier<sup>2</sup>, Suzanne Daignan Fornier<sup>2</sup>, Ambre Guillory<sup>1</sup>, Sandrine Bonhomme<sup>1</sup>, Catherine Rameau<sup>1</sup>, François-Didier Boyer<sup>2\*</sup>**

<sup>1</sup> Université Paris-Saclay, INRAE, AgroParisTech, Institut Jean-Pierre Bourgin (IJPB), 78000, Versailles, France

<sup>2</sup> Université Paris-Saclay, CNRS, Institut de Chimie des Substances Naturelles, UPR 2301, 91198, Gif-sur-Yvette, France

**Supplementary Tables**

| Compound<br>(no. of replicates) <sup>a</sup> | Concentration | Length of bud at node 3<br>/branch (mm) <sup>b</sup> | SE   | p-value <sup>d</sup> |
|----------------------------------------------|---------------|------------------------------------------------------|------|----------------------|
| GC116                                        | 10,000 nM     | 2.43                                                 | 0.12 | 0.000000e+00         |
|                                              | 1,000 nM      | 1.67                                                 | 0.09 | 0.000000e+00         |
|                                              | 1,000 nM      | 3.13                                                 | 1.43 | 0.000000E+00         |
|                                              | 1,000 nM      | 1.60                                                 | 0.08 | 0.000000e+00         |
|                                              | 1,000 nM      | 2.22                                                 | 0.19 | 0.000000e+00         |
|                                              | 1,000 nM      | 1.97                                                 | 0.09 | 0.000000e+00         |
|                                              | 1,000 nM      | 2.21                                                 | 0.07 | 0.000000e+00         |
|                                              | 100 nM        | 1.96                                                 | 0.11 | 0.000000e+00         |
|                                              | 100 nM        | 1.72                                                 | 0.11 | 0.000000e+00         |
|                                              | 100 nM        | 2.66                                                 | 0.26 | 2.084775e-10         |
|                                              | 100 nM        | 2.29                                                 | 0.09 | 0.000000e+00         |
|                                              | 100 nM        | 2.46                                                 | 0.15 | 0.000000e+00         |
|                                              | 10 nM         | 2.47                                                 | 0.19 | 3.762324e-12         |
|                                              | 10 nM         | 2.26                                                 | 0.20 | 0.000000e+00         |
|                                              | 10 nM         | 5.20                                                 | 1.48 | 3.729298e-04         |
|                                              | 10 nM         | 4.34                                                 | 0.66 | 0.000000e+00         |
|                                              | 10 nM         | 3.85                                                 | 0.63 | 0.000000e+00         |
|                                              | 1 nM          | 6.38                                                 | 1.09 | 1.221245e-15         |
|                                              | 0.1 nM        | 11.47                                                | 1.40 | 1.464535e-01         |

|       |           |       |      |              |
|-------|-----------|-------|------|--------------|
| GC155 | 10,000 nM | 2.06  | 0.10 | 0.000000e+00 |
|       | 1,000 nM  | 1.98  | 0.23 | 0.000000e+00 |
|       | 1,000 nM  | 1.45  | 0.10 | 0.000000e+00 |
|       | 1,000 nM  | 1.92  | 0.11 | 2.231548e-14 |
|       | 1,000 nM  | 1.96  | 0.11 | 0.000000e+00 |
|       | 1,000 nM  | 2.38  | 0.14 | 0.000000e+00 |
|       | 1,000 nM  | 2.32  | 0.11 | 0.000000e+00 |
|       | 100 nM    | 5.98  | 2.00 | 2.793725e-03 |
|       | 100 nM    | 1.83  | 0.31 | 0.000000e+00 |
|       | 100 nM    | 3.68  | 0.87 | 8.323844e-02 |
|       | 100 nM    | 4.11  | 1.00 | 0.000000e+00 |
|       | 100 nM    | 2.71  | 0.13 | 0.000000e+00 |
|       | 10 nM     | 5.97  | 1.73 | 3.518254e-04 |
|       | 10 nM     | 16.85 | 6.28 | 1.581675E-02 |
|       | 10 nM     | 8.43  | 1.42 | 0.000000e+00 |
| GC379 | 10,000 nM | 2.17  | 0.09 | 0.000000e+00 |
|       | 1,000 nM  | 3.38  | 0.73 | 2.260369e-01 |
|       | 1,000 nM  | 3.19  | 0.23 | 0.000000e+00 |
|       | 1,000 nM  | 3.65  | 0.87 | 0.000000e+00 |
|       | 1,000 nM  | 3.04  | 0.81 | 0.000000e+00 |
|       | 100 nM    | 2.81  | 0.54 | 5.485758e-04 |
|       | 100 nM    | 5.02  | 1.14 | 0.000000e+00 |
|       | 100 nM    | 3.98  | 0.93 | 0.000000e+00 |
|       | 100 nM    | 14.32 | 3.98 | 7.197213e-01 |

|       |           |       |      |              |
|-------|-----------|-------|------|--------------|
|       | 10 nM     | 3.54  | 0.93 | 0.000000e+00 |
| GC380 | 10,000 nM | 2.15  | 0.11 | 0.000000e+00 |
|       | 1,000 nM  | 2.33  | 0.23 | 9.998758e-01 |
|       | 1,000 nM  | 3.47  | 1.02 | 0.000000e+00 |
|       | 1,000 nM  | 2.08  | 0.16 | 0.000000e+00 |
|       | 100 nM    | 8.99  | 1.78 | 2.013884e-07 |
|       | 100 nM    | 11.66 | 1.93 | 3.914880e-05 |
|       | 100 nM    | 5.90  | 1.34 | 0.000000e+00 |
|       | 10 nM     | 6.65  | 1.39 | 0.000000e+00 |
| GC247 | 10,000 nM | 6.54  | 1.01 | 5.605286e-03 |
|       | 1,000 nM  | 26.93 | 2.14 | 7.244459e-01 |
|       | 1,000 nM  | 18.57 | 1.13 | 6.735066e-01 |
|       | 1,000 nM  | 16.56 | 1.36 | 0.000000e+00 |
|       | 100 nM    | 15.23 | 1.46 | 1.000000e+00 |
|       | 100 nM    | 14.78 | 2.88 | 2.188517e-01 |
|       | 100 nM    | 11.82 | 1.21 | 6.683622e-02 |
|       | 10 nM     | 12.39 | 1.20 | 5.732650e-02 |
| GC93  | 10,000 nM | 3.89  | 0.55 | 3.938098e-06 |
|       | 1,000 nM  | 21.70 | 2.48 | 3.400014e-01 |
|       | 1,000 nM  | 10.23 | 1.34 | 1.629355e-01 |
|       | 1,000 nM  | 11.80 | 1.30 | 1.516977e-01 |
|       | 100 nM    | 20.83 | 0.66 | 1.231200e-02 |
|       | 100 nM    | 17.20 | 1.06 | 9.999864e-01 |

|       |                       |       |      |              |
|-------|-----------------------|-------|------|--------------|
|       | 10 nM                 | 17.73 | 1.10 | 1.000000e+00 |
| YLG   | 10,000 nM             | 2.44  | 0.43 | 0.000000e+00 |
|       | 10,000 nM             | 4.81  | 1.02 | 0.000000e+00 |
|       | 1,000 nM              | 7.40  | 1.87 | 7.241036e-01 |
|       | 1,000 nM              | 15.90 | 1.79 | 5.498252e-01 |
|       | 1,000 nM              | 3.40  | 0.68 | 3.165924e-09 |
|       | 1,000 nM              | 5.59  | 1.10 | 0.000000e+00 |
|       | 1,000 nM              | 14.28 | 1.97 | 1.990799e-08 |
|       | 100 nM                | 5.27  | 1.13 | 4.097332e-02 |
|       | 100 nM                | 19.15 | 1.45 | 1.000000e+00 |
|       | 100 nM                | 8.39  | 1.68 | 1.887069e-02 |
|       | 100 nM                | 22.73 | 1.33 | 9.953965e-01 |
|       | 100 nM                | 19.89 | 2.35 | 2.426501e-01 |
|       | 10 nM                 | 24.15 | 0.98 | 7.806233e-01 |
| GC240 | 5,000 nM <sup>c</sup> | 2.61  | 0.23 | 0.000000e+00 |
|       | 1,000 nM              | 14.17 | 2.02 | 9.999973e-01 |
|       | 1,000 nM              | 6.22  | 2.01 | 3.78319e-09  |
|       | 1,000 nM              | 5.64  | 0.85 | 0.000000e+00 |
|       | 1,000 nM <sup>c</sup> | 2.52  | 0.25 | 0.000000e+00 |
|       | 1,000 nM              | 6.85  | 1.05 | 0.000000e+00 |
|       | 100 nM                | 17.88 | 1.79 | 9.552628e-01 |
|       | 100 nM                | 10.78 | 1.60 | 2.039812e-01 |
|       | 100 nM                | 17.14 | 1.35 | 2.764565e-10 |
|       | 10 nM                 | 19.68 | 1.67 | 4.675064e-01 |

|       |                       |       |      |              |
|-------|-----------------------|-------|------|--------------|
|       | 10 nM                 | 15.01 | 1.39 | 9.998463e-01 |
|       | 10 nM                 | 22.08 | 1.91 | 5.122958e-01 |
| GC486 | 5,000 nM              | 14.02 | 1.80 | 3.208221e-01 |
|       | 5,000 nM              | 7.80  | 1.61 | 5.733226E-01 |
|       | 5,000 nM <sup>c</sup> | 17.41 | 2.10 | 9.763187e-01 |
|       | 1,000 nM <sup>c</sup> | 9.26  | 2.37 | 2.647994e-01 |
|       | 1,000 nM              | 23.14 | 0.94 | 1.912903e-01 |
|       | 100 nM                | 22.10 | 1.39 | 7.608111e-02 |
|       | 10 nM                 | 24.70 | 1.12 | 9.932760e-01 |
| GC242 | 10,000 nM             | 1.77  | 0.07 | 0.000000e+00 |
|       | 1,000 nM              | 2.09  | 0.11 | 0.000000e+00 |
|       | 1,000 nM              | 3.26  | 0.61 | 3.554379e-12 |
|       | 1,000 nM              | 1.78  | 0.10 | 0.000000e+00 |
|       | 1,000 nM              | 2.25  | 0.28 | 0.000000e+00 |
|       | 1,000 nM              | 1.64  | 0.07 | 0.000000e+00 |
|       | 1,000 nM              | 1.40  | 0.04 | 0.000000e+00 |
|       | 1,000 nM              | 1.70  | 0.08 | 0.000000e+00 |
|       | 1,000 nM              | 1.98  | 0.08 | 0.000000e+00 |
|       | 100 nM                | 2.02  | 0.08 | 0.000000e+00 |
|       | 100 nM                | 1.80  | 0.08 | 0.000000e+00 |
|       | 100 nM                | 4.33  | 1.37 | 3.508555e-08 |
|       | 100 nM                | 4.20  | 1.73 | 0.000000e+00 |
|       | 100 nM                | 1.75  | 0.13 | 0.000000e+00 |

|                    |           |       |      |              |
|--------------------|-----------|-------|------|--------------|
|                    | 100 nM    | 1.66  | 0.06 | 0.000000e+00 |
|                    | 100 nM    | 2.05  | 0.10 | 0.000000e+00 |
|                    | 10 nM     | 9.36  | 1.88 | 2.622541e-01 |
|                    | 10 nM     | 6.13  | 1.18 | 0.000000e+00 |
| 7-Acetoxycoumarin  | 1,000 nM  | 25.33 | 1.02 | 9.998766e-01 |
|                    | 100 nM    | 22.67 | 1.91 | 8.566230e-01 |
|                    | 10 nM     | 21.81 | 1.30 | 6.403749e-02 |
| DIFMUA             | 1,000 nM  | 22.17 | 1.24 | 1.051261e-01 |
|                    | 100 nM    | 19.75 | 1.61 | 1.669144e-03 |
|                    | 10 nM     | 23.71 | 1.70 | 9.895969e-01 |
| 7-hydroxycoumarine | 1,000 nM  | 41.46 | 9.43 | 9.991303e-01 |
| DiFMU              | 10,000 nM | 19.07 | 0.99 | 7.238675e-01 |
|                    | 10,000 nM | 7.67  | 1.89 | 6.997665e-01 |
|                    | 5,000 nM  | 16.25 | 0.65 | 9.999711e-01 |
|                    | 5,000 nM  | 8.44  | 1.58 | 6.997665e-01 |
|                    | 1,000 nM  | 14.76 | 1.77 | 7.908909e-01 |
| Resorufin          | 1,000 nM  | 14.90 | 1.13 | 9.899278e-01 |
|                    | 100 nM    | 16.50 | 0.80 | 9.999784e-01 |
|                    | 10 nM     | 12.53 | 1.15 | 1.447628e-01 |

**Supplementary Table 1. Bud outgrowth inhibition activity assay results for SL probes and derivatives by direct application on *rms1-10* pea mutant plants.** <sup>a</sup>All the replicates are presented in Supplemental Table 1. <sup>b</sup>These data were obtained from means  $\pm$  SE ( $n = 24$ ), 10 days after treatment. <sup>c</sup>Tested previously (De saint Germain et al 2016). <sup>d</sup>Comparison of the SL treatment to the control treatment (0 nM) using the Kruskal-Wallis rank sum test.

| Compound<br>(no. of replicates) <sup>a</sup> | Concentration | Length of bud at node 3<br>/branch <sup>b</sup> | SE   | p-value <sup>c</sup> |
|----------------------------------------------|---------------|-------------------------------------------------|------|----------------------|
| GC379                                        | 1,000 nM      | 26.30                                           | 0.70 | 5.353000e-01         |
| GC380                                        | 1,000 nM      | 23.62                                           | 1.63 | 5.353000e-01         |
| GC242                                        | 5,000 nM      | 33.76                                           | 2.19 | 7.156579e-01         |
|                                              | 1,000 nM      | 35.80                                           | 1.49 | 9.991219e-01         |

**Supplementary Table 2. Bud outgrowth inhibition activity assay results for SL probes by direct application on *rms3-4* pea mutant plants.** <sup>a</sup> All the replicates are presented in Supplemental Table 2. <sup>b</sup> These data were obtained from means  $\pm$  SE ( $n = 24$ ), 10 days after treatment. <sup>c</sup> Comparison of the SL treatment to the control treatment (0 nM) using the Kruskal-Wallis rank sum test.



| Compound<br>(no. of replicates) <sup>a</sup> | Concentration | Length of bud at node 3, 4, 5<br>/branch (mm) <sup>b</sup> | SE   | p-value <sup>f</sup> | p-value <sup>g</sup> | p-value <sup>h</sup> | p-value <sup>i</sup> |
|----------------------------------------------|---------------|------------------------------------------------------------|------|----------------------|----------------------|----------------------|----------------------|
| GC242                                        | 3,000 nM      | 1.90 <sup>c</sup>                                          | 0.12 | 0.000000e+00         |                      |                      |                      |
|                                              | 3,000 nM      | 2.11 <sup>c</sup>                                          | 0.14 | 0.000000e+00         |                      | 9.999997e-01         | 0.000000e+00         |
|                                              | 3,000 nM      | 1.26 <sup>d</sup>                                          | 0.04 | 0.000000e+00         |                      |                      |                      |
|                                              | 3,000 nM      | 1.15 <sup>d</sup>                                          | 0.10 | 0.000000e+00         |                      | 6.623814e-03         |                      |
|                                              | 3,000 nM      | 0.98 <sup>d</sup>                                          | 0.03 | 0.000000e+00         |                      | 6.847110e-06         | 1.712978e-02         |
|                                              | 3,000 nM      | 1.01 <sup>e</sup>                                          | 0.05 | 0.000000e+00         |                      |                      |                      |
|                                              | 3,000 nM      | 0.71 <sup>e</sup>                                          | 0.11 | 0.000000e+00         |                      | 0.000000e+00         |                      |
|                                              | 3,000 nM      | 0.76 <sup>e</sup>                                          | 0.04 | 0.000000e+00         |                      | 0.000000e+00         | 0.000000e+00         |
| YLG                                          | 3,000 nM      | 6.24 <sup>c</sup>                                          | 2.06 | 4.097445e-04         | 3.046445e-02         |                      |                      |
|                                              | 3,000 nM      | 4.04 <sup>c</sup>                                          | 0.45 | 1.469103e-11         | 6.026631e-01         | 6.641796e-01         | 0.000000e+00         |
|                                              | 3,000 nM      | 3.17 <sup>d</sup>                                          | 1.06 | 7.253980e-05         | 4.463705e-03         |                      |                      |
|                                              | 3,000 nM      | 3.36 <sup>d</sup>                                          | 1.24 | 4.647728e-01         | 1.420836e-04         | 9.805131e-01         |                      |
|                                              | 3,000 nM      | 2.07 <sup>d</sup>                                          | 0.59 | 1.262800e-03         | 8.146868e-02         | 9.902806e-01         | 9.953035e-01         |
|                                              | 3,000 nM      | 3.25 <sup>e</sup>                                          | 0.57 | 5.912796e-05         | 0.000000e+00         |                      |                      |
|                                              | 3,000 nM      | 1.91 <sup>e</sup>                                          | 0.40 | 4.303795E-01         | 0.000000e+00         | 9.996235e-01         |                      |
|                                              | 3,000 nM      | 1.46 <sup>e</sup>                                          | 0.14 | 0.000000e+00         | 0.000000e+00         | 9.999605e-01         | 1.849925e-01         |
| GC93                                         | 3,000 nM      | 11.61 <sup>c</sup>                                         | 3.82 | 4.954004e-01         |                      | 4.909945e-01         |                      |
|                                              | 3,000 nM      | 3.96 <sup>d</sup>                                          | 1.14 | 1.170460e-04         |                      | 4.122257e-01         |                      |

**Supplementary Table 3. Bud outgrowth inhibition activity assay results for SL probes and derivatives by vascular supply on *rms1-10* pea mutant plants.** <sup>a</sup>All the replicates are presented in Supplemental Table 3. <sup>b</sup>These data were obtained from means ± SE ( $n = 12$ ), 10

days after treatment. <sup>c</sup> Node 3. <sup>d</sup> Node 4. <sup>e</sup> Node 5. <sup>f</sup> Comparison of the SL treatment to the control treatment (0 nM) using the Kruskal-Wallis rank sum test. <sup>g</sup> Comparison of the SL treatment to (±)-GC242 treatment (3000 nM) using the Kruskal-Wallis rank sum test. <sup>h</sup> Comparison of the SL treatment to (±)-GR24 treatment (3000 nM) using the Kruskal-Wallis rank sum test. <sup>i</sup> Comparison of the SL treatment to wild type *Tèrese non* treated using the Kruskal-Wallis rank sum test.

**A**

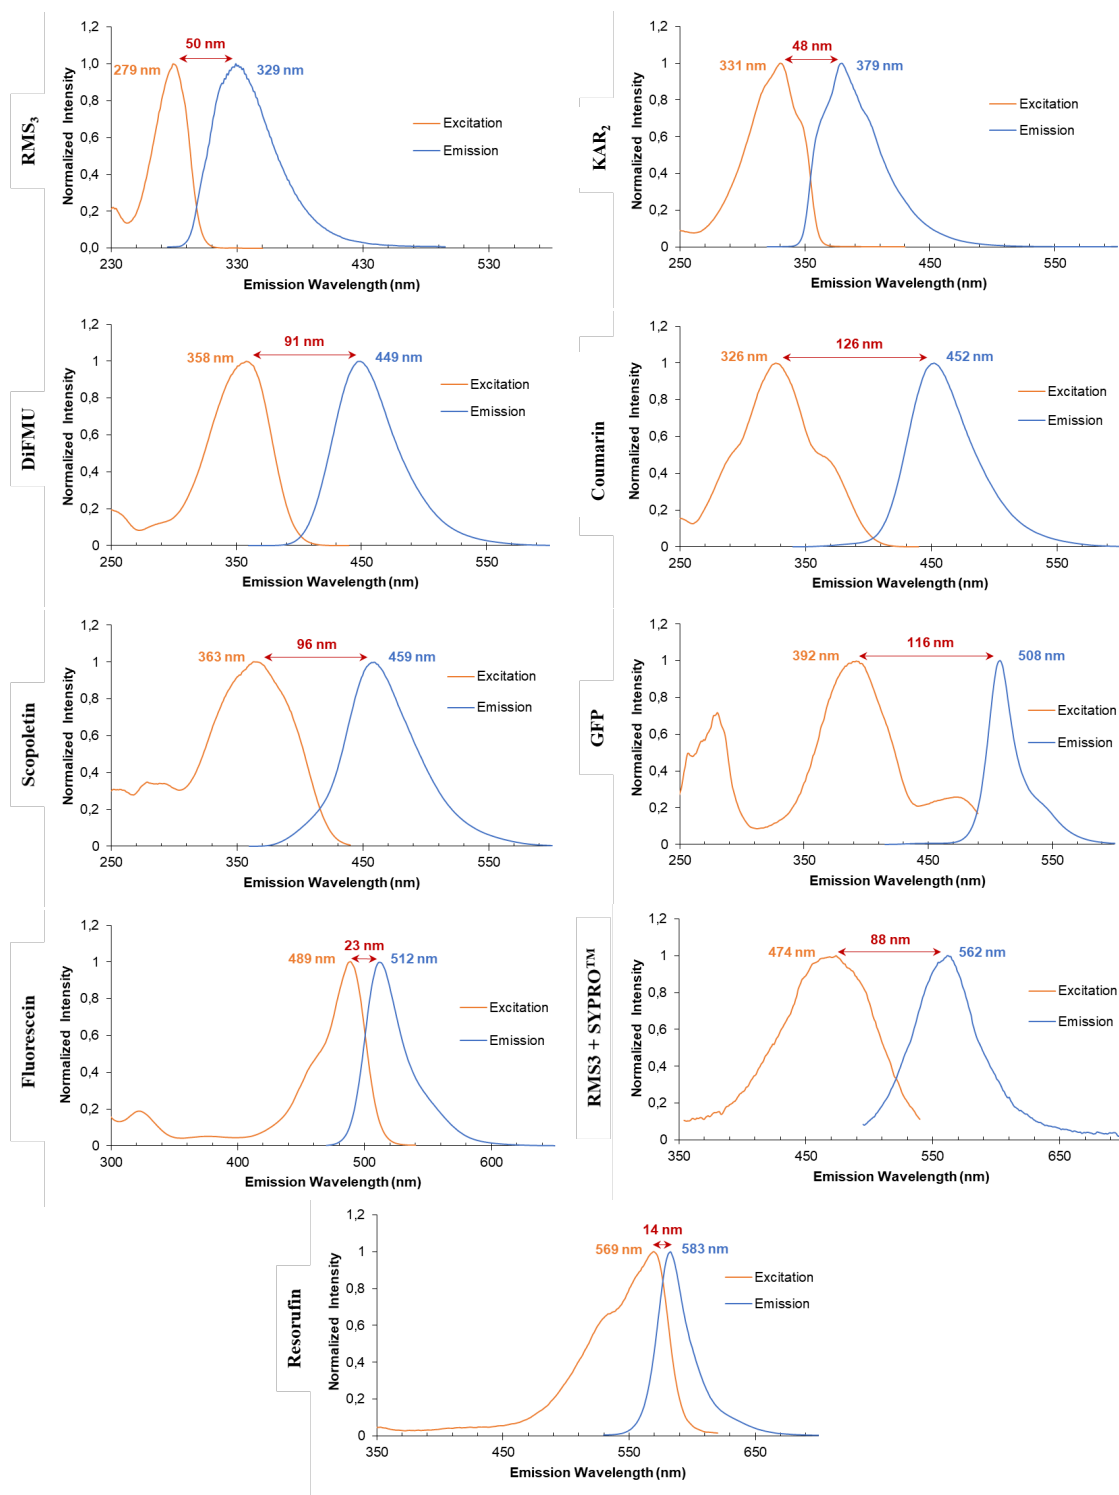

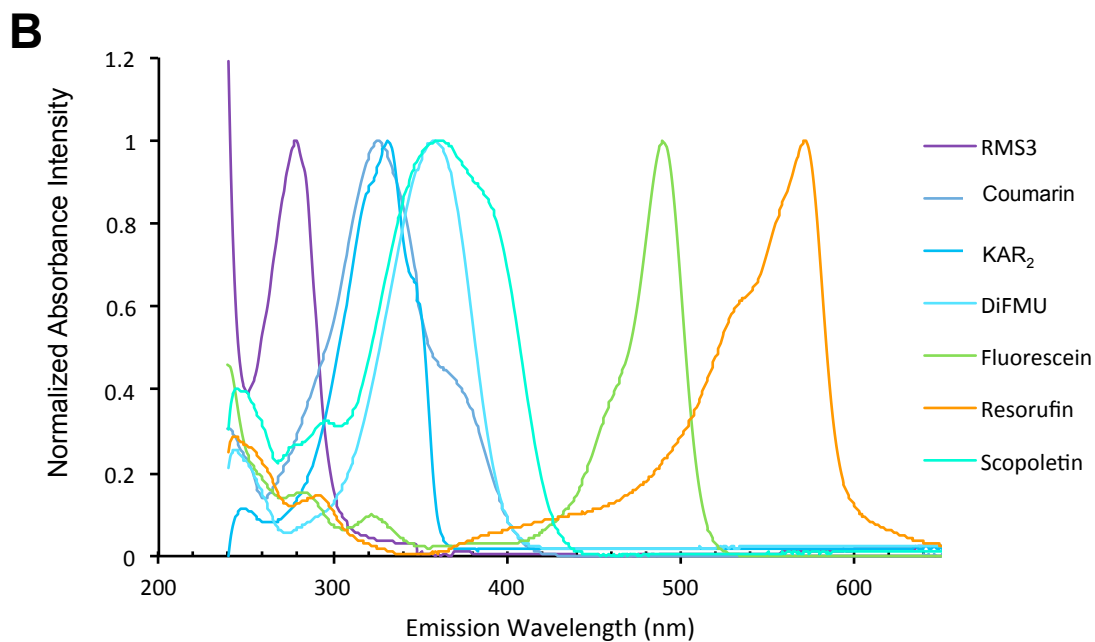

**Supplemental Figure 1. Fluorescence emission and excitation spectra** recorded in PBS Buffer pH = 7.6 of various fluorophores and RMS3 protein at 25 °C (**A**). Superposition of absorbance spectra recorded in PBS Buffer pH = 7.6 at 25 °C (**B**). The Stokes shift is indicated in red.

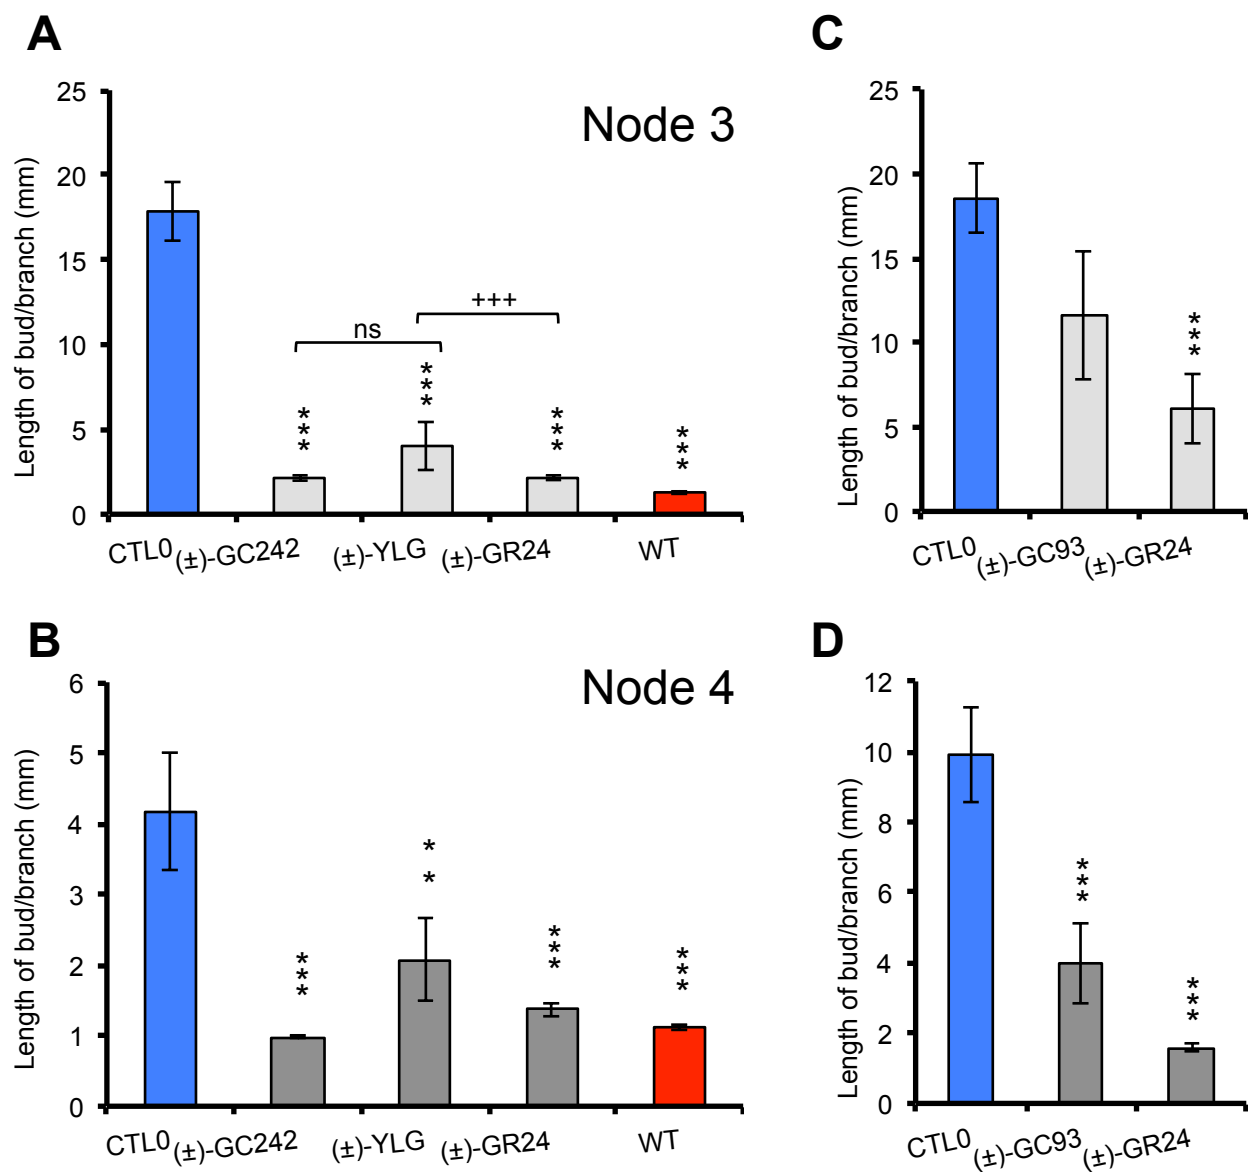

**Supplemental Figure 2. Bud outgrowth inhibition activity assay results for SL analogs ((±)-GC242 and (±)-YLG (A,B); (±)-GC93 (C,D)) by vascular supply (3000 nM).** <sup>a</sup> All the replicates are presented in Supplemental Table 2 with control 0. <sup>b</sup> These data were obtained from means  $\pm$  SE ( $n = 12$ ), 10 days after treatment. . \*  $P < 0.05$ , \*\*  $P < 0.01$ , \*\*\*  $P < 0.001$  indicate significant differences with the control treatment (0 nM) (Kruskal–Wallis rank sum test). CTL 0 = control 0. +++  $P < 0.001$  indicates significant differences with the (±)-GC242 treatment (3000 nM) (Kruskal–Wallis rank sum test). ns = not significant.

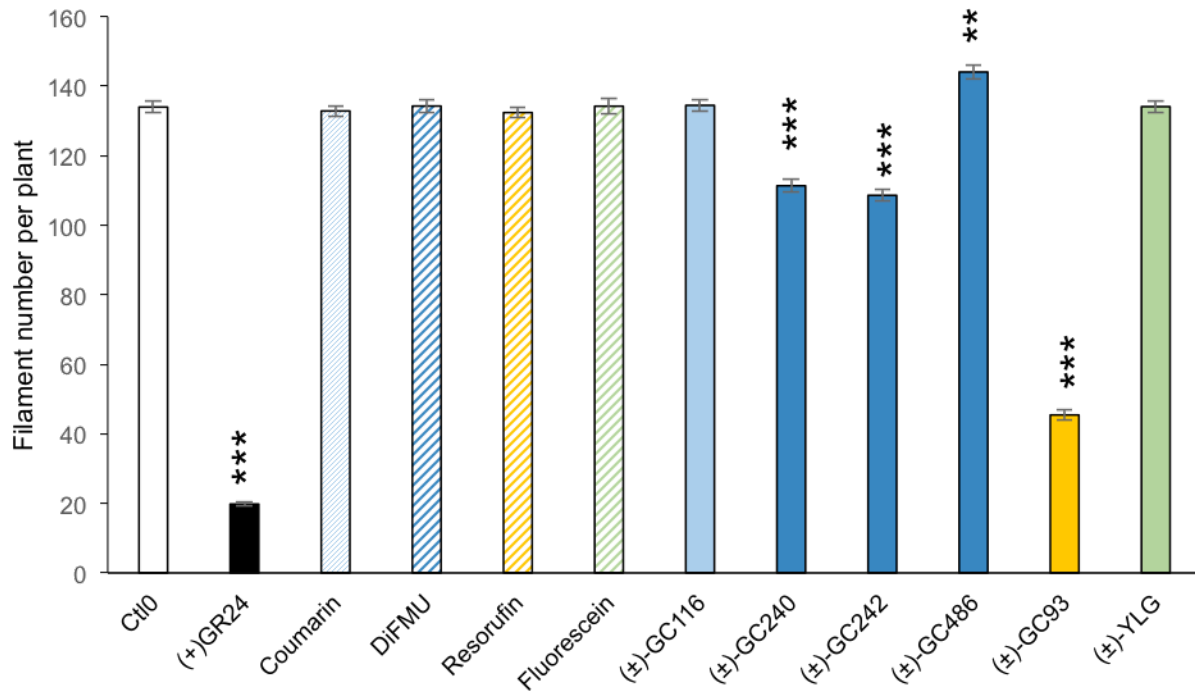

**Supplemental Figure 3. Probe bioactivity tested on the moss *P. patens*.** Bioactivity of fluorophores and profluorescent probes was assayed by counting the number of filaments grown in the dark following application, and compared to that of DMSO (control 0, white), and (+)-GR24 (in black). Each compound was used at 1  $\mu$ M. Fluorophore bars are hatched, while pro-fluorescent probe bars are filled. Data are mean  $\pm$  SE of 24 *Ppccd8* mutant plants ( $n = 24$ ) grown in 3 different 24-well plates. Significant differences between the control treatment (0 nM) and treated plants are based on ANOVA and Tukey Test as post hoc test; \*\*  $P < 0.01$ , \*\*\*  $P < 0.001$ . CTL0 = control 0.

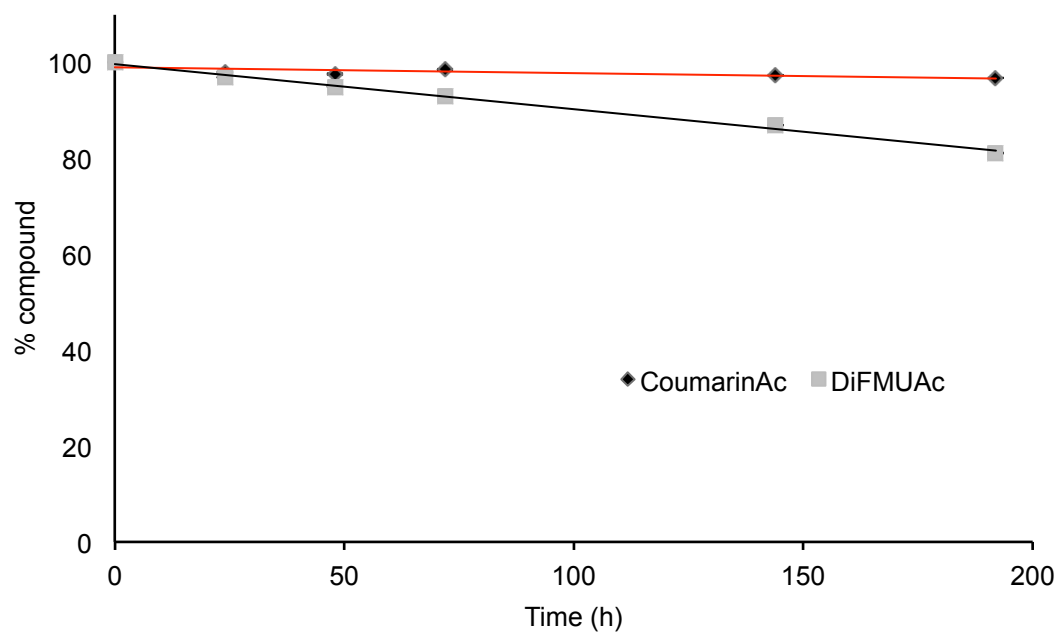

**Supplemental Figure 4. Stability of CoumarinAc and DiFMUAc.** Chemical hydrolysis of CoumarinAc and DiFMUAc in DMSO at 20 °C. Data are means  $\pm$  SE (n = 3).

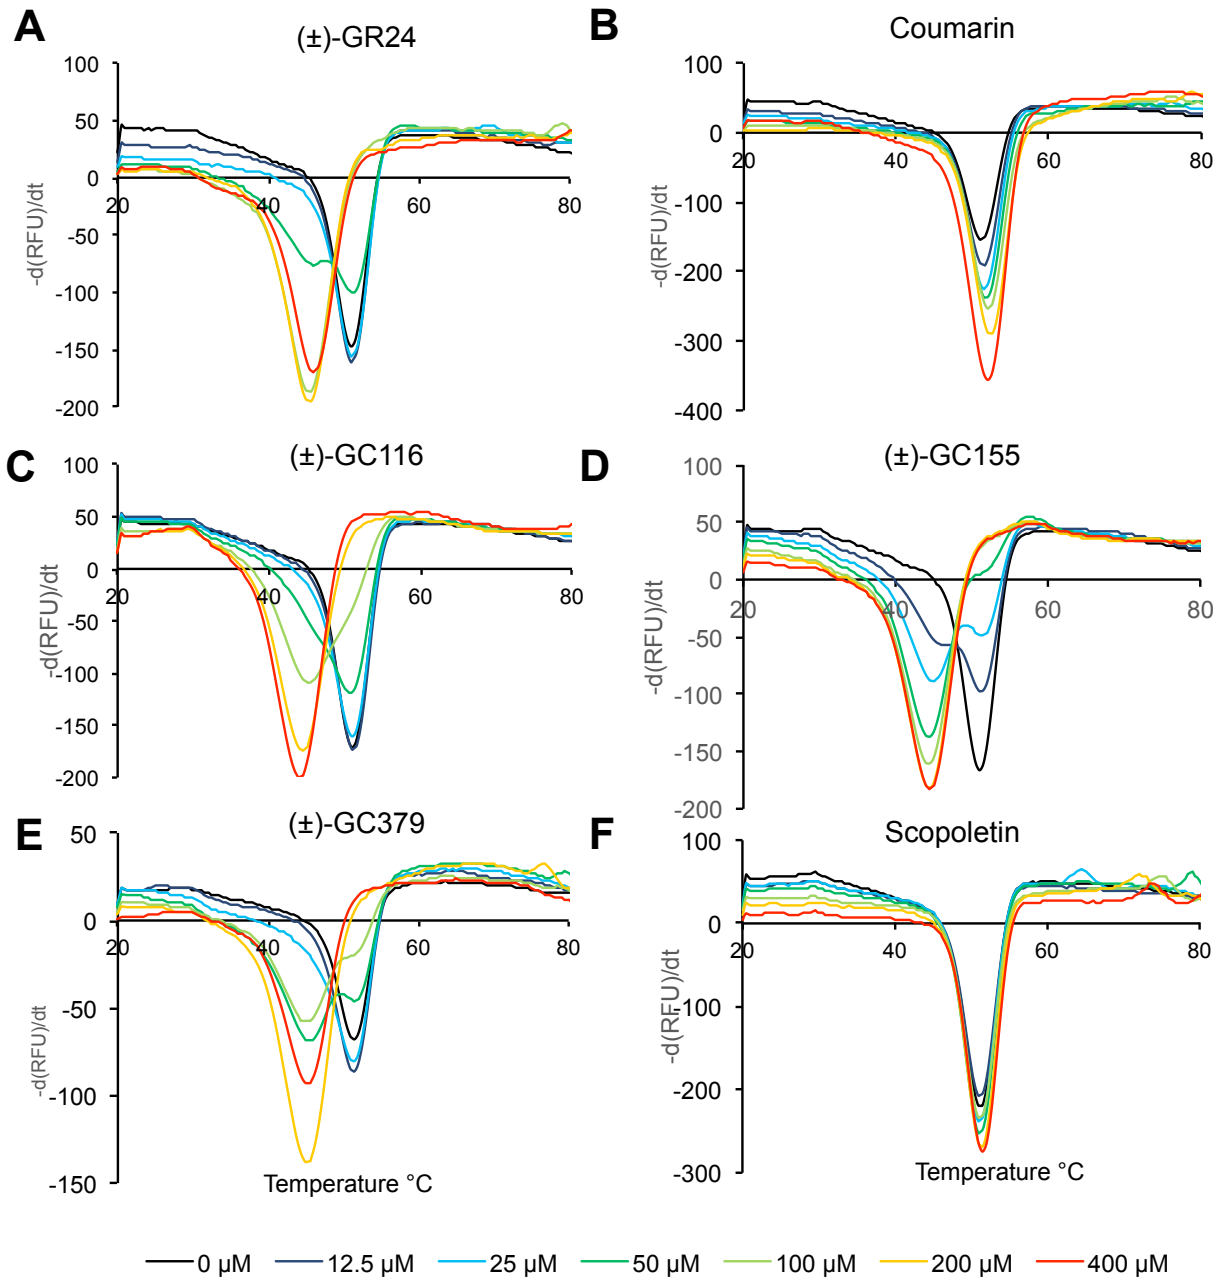

**Supplemental Figure 5. DSF assay with SL profluorescent probes.** The melting temperature curves of 10  $\mu\text{M}$  RMS3 with ( $\pm$ )-GR24 (A), coumarin (B), ( $\pm$ )-GC116 (C), ( $\pm$ )-GC155 (D), ( $\pm$ )-GC379 (E) and scopoletin (F) at varying concentrations are shown as assessed by DSF. Each line represents
